# Supplementary material for: Identification, expression and characterization of rat isoforms of the serum response factor (SRF) coactivator MKL1
Source: PubMed Central journal article supplement — FEBS Open Bio. 2013 Sep 7;3:387–93. doi: 10.1016/j.fob.2013.09.001 (PMC3821035; doi:10.1016/j.fob.2013.09.001), 2013-09-07
Supplement: mmc1.pdf [file mmc1.pdf]

Supplemental figure 1

# FLMKL1

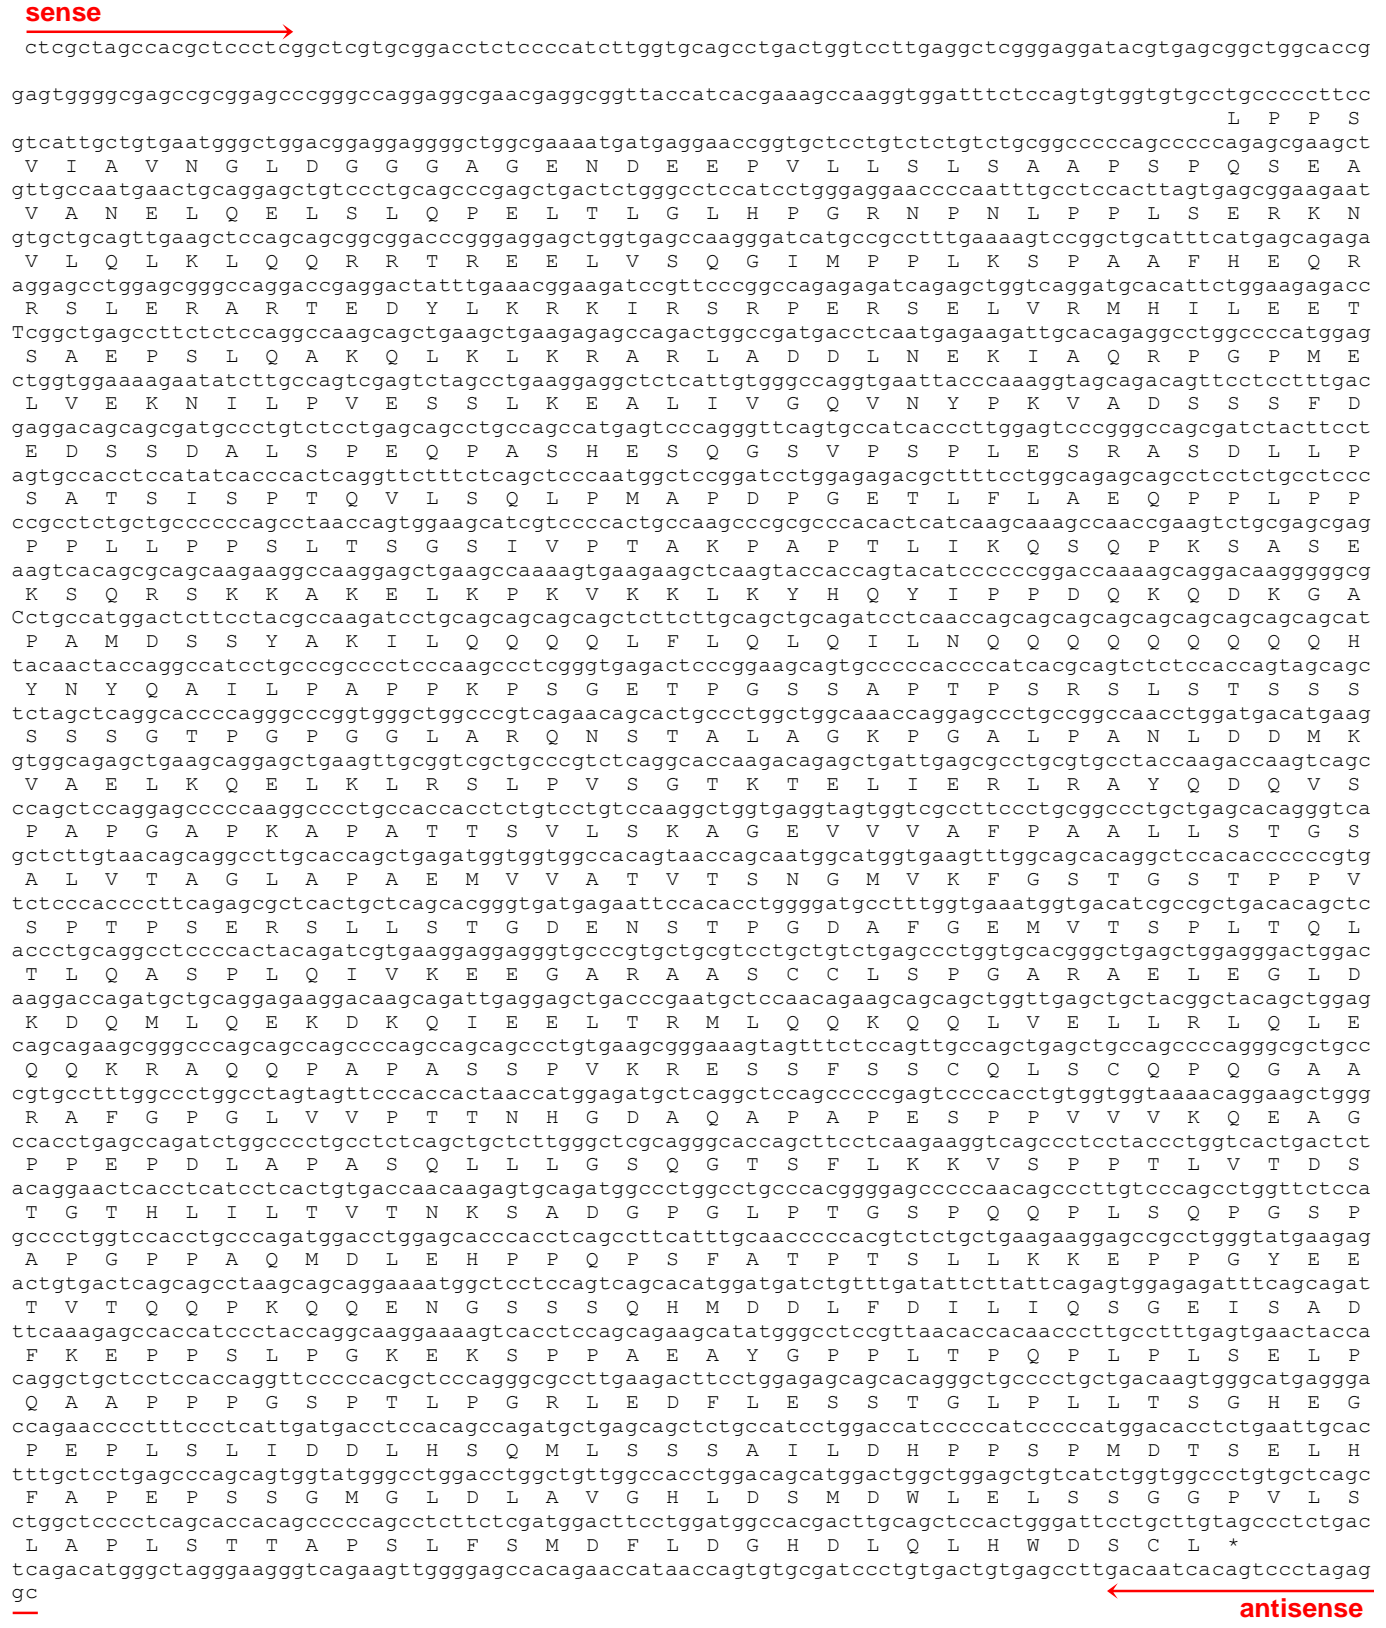

**Figure S1. Nucleotide and deduced amino acid sequences of FLMKL1.**  
The nucleotide sequence data reported are available in the DDBJ database under accession number AB588919. Arrows in red indicate the primers for cDNA cloning. The arrow's nucleotide sequences are excluded in the DDBJ database.

## Supplemental figure 2

# BSAC

**sense** 

gctgggcttctgtctgcactcaactctgggcatcttgcttgctgaggggtggagagttggtgcttccaggagaagagcagtggagtctcac  
gttctctctgcacacaggcatgggactgagtttgtaaagcctgctggtgctttagactttcctgcgactggacttttggatttggctggtttt  
cgtgaggactccgtcatgactctgctggagcctgagatgctaataatgatggtgctgctgactcagtgctgcaagctccagcagcgggcggaccggaggag  
M T L L E P E M L M M A V Q S V L Q L K L Q Q R R T R E E  
ctggtgagccaagggatcgtccgccctttgaaaagtcggctgcatttcatgagcagagaaggagcctggagcgggccaggaccgagactatttgaacgg  
L V S Q G I M P P L K S P A A F H E Q R R S L E R A R T E D Y L S Q L  
aagatccgttccggccagagagatcagagctgggtcaggatgcacatttggagaagacctgggctgagccttctccaggccaagcagctgaagctgaag  
K I R S R P E R S E L V R M H I L E E T S A E P S L Q A K Q L K L K  
agagccagactggccgatgacctcaatgagaagattgcacagaggcctggccccatggagctgggtggaaaagaatatcttgccagctcgagctagcctgaag  
R A R L A D D L N E K I A Q R P G P M E L V E K N I L P V E S S L K  
gaggctctcattggtggccaggtgaattacccaaaggtagcagacagttcctcctttgacgaggacagcagcagatgcccctgtctctgagcagcctgccagc  
E A L I V G Q V N Y P K V A D S S S F D E D S S D A L S P E Q P A S  
catgagctcccagggttgcattcacccttggagtccggggcagcgatctacttctagtgcacattcaccctcattcaccctcaggttcttctcagctc  
H E S Q G S V P S P L E S R A S D L L P S A T S I S P T Q V L S Q L  
ccaatggctccggatctcggagagagcttttctggcagagcagcctcctctgctccccgcctctgctgccccccagcctaaccagtggaagcagcctc  
P M A P D P G E T L F L A E Q P P L P P P P L L P P S L T S G S I V  
cccactgccaccggcggcccacactcatcaagcaaaccccaaggtcctgagcagcagcaagcaagcaagcaagcaagcaagcaagcaagcaagcaagca  
P T A K P A P T L I K Q S A P K S A S E K S Q R S K K A K E L K P K  
gtgaaagctcaagtagcagcagcagcagcagcagcagcagcagcagcagcagcagcagcagcagcagcagcagcagcagcagcagcagcagcagcagc  
V K K L K Y H Q Y I P P D Q K Q D K G A P A M D S S Y A K I L Q Q Q  
cagctcttctgagcagctcagctcctcaaccagcagcagcagcagcagcagcagcagcagcagcagcagcagcagcagcagcagcagcagcagcagcagc  
Q L F L Q L Q I L N Q Q Q Q Q Q Q Q Q Q H Y N Y Q A I L P A P P K P S  
ggtgagactcccgggaagcagtgccccccccatcagcagctctcccaccagtagcagctcagcagcagcagcagcagcagcagcagcagcagcagcagcag  
G E T P G S S A P T P S R S L S T S S S S S S S S G T P G P G G L A R Q  
aacagcactgccccgtggtggcaaacaggagccctgccccccaacctggatgacatgaaggtggcagagctgaagcagagctgaagtgaggctgccc  
N S T A L A G K P G A L P A N L D D M K V A E L K Q E L K L R S L P  
gtctcaggcaccagacagagctgattgagcctgcctgaccccaagcaagctagcagcagcagcagcagcagcagcagcagcagcagcagcagcagcagc  
V S G T K T E L I E R L R A Y Q D Q V S P A P G A P K A P A T T S V  
ctgtccaaggctggtgagtgagtggtgccttccctgcgccctgctgagcaagggtcagctcttgaacagcagcagcctgaccagctgagatggtggtg  
L S K A G E V V A F P A A L L S T G S A L V T A G L A P A E M V V  
gccacagtaaacgcaatggtggaagtggcagcagcagcagcagcagcagcagcagcagcagcagcagcagcagcagcagcagcagcagcagcagcagcagc  
A T V T S N G M V K F G S T G S T P P V S P T P S E R S L L S T G D  
gagaattccacacctggggatgcttgggtgaaatggtgacatcggcgtgacacagctcaccctgaggcctccccactacagatcgtgaaggagagggt  
E N S T P G D A F G E M V T S P L T Q L T L Q A S P L Q I V K E E G  
gcccgtgctgctcctgtctgctgagcctggtgacgggtgagctggaggatggacaaggaccagatgctgcaggagaggaagcaagcagactgaggag  
A R A A S C C L S P G A R A E L E G L D K R A F Q M L Q E K D Q Q I E E  
ctgaccgcaatgctccaacagaagcagcagctggttagctgctacggtacagctggagcagcagcaagggggccagcagcagcagcagcagcagcagc  
L T R M L Q Q K Q Q L V E L L R L Q L E Q Q K R A Q Q P A P A S S P  
gtgaagcgggaaagttagtttccagttgccagctgagctgcccaggcggcgctgcccctgcttggcctggcctagtagttccaccactaacct  
V K R E S S F S S C Q L S C Q P Q G L A C R A F G P G L V P P T N K S A  
ggagatgctcaggctccagccccagctccccacctggtggtggtaaaacaggaagtgggccacctgagccagatctggccccctgctcctcagctgctctt  
G D A Q A P A P E S P P V V V K Q E A G P P E P D L A P A S Q L L L  
ggctcgcagggcaccagcttctcaagaaggtcagcctcctaccctggtcactgactctacaggaactcacctcactcactggtgaccaacaagagtga  
G S Q G T S F L K K V S P P T L V T D S T G T H L I L T V T N K S A  
gatggccctggcctgccccaggggagcccccaacagcccttggccagcctggttctccagccccctggtccacctgcccagatggacctggagcaccacct  
D G P G L P T G S P Q Q P L S Q P G S P A P G P P A Q M D L E H P P  
cagccttatttgaacccccagctctctgctgaagaaggagcgcctgggtatgaagagctgctgactcagcagcctaaagcagcagcaaatggctcctcc  
Q P S F A T P T S L L K K E P P G Y E E T V T Q Q P K A Q Q E N G S S  
agtcaagcacatggtatgctgtttgatatttatttcaagagtggtgagatggtcagcagatttcaagagaccacacacctaccagggcaaggaagctcacct  
S Q H M D D L F D I L I Q S G E I S A D F K E P P S L P G K E K S P  
ccagcagaagcatatggcctccgttaaacaccacaacacctgccccttggatgaaactaccacaggtctcctccaccaggttccccacgctcccaggggccc  
P A E A Y G P P L T P Q P L P L S E L P Q A A P P P G S P T L P G R  
cttgaagactcctggagcagcagcagcagcagcagcagcagcagcagcagcagcagcagcagcagcagcagcagcagcagcagcagcagcagcagcagc  
L E D F L E S S T G L P L L T S G H E G P E P L S L I D D L H S Q M  
ctgagcagctgcccctccaggacatccccatccccatggacacctctgaattgcactttgctctgagccagcagtggtatggcctggacctggct  
L S S A I L D H P P S P M D T S E L H F A P E P S S G M G L D L A  
gttgccacctggacagcagcagcagcagcagcagcagcagcagcagcagcagcagcagcagcagcagcagcagcagcagcagcagcagcagcagcagc  
V G H L D S M D W L E L S S G G P V L S L A P L S T T A P S L F S M  
gacttctggtggtggcagcttgcagctccactgggattcctgctgtagccctcctgactcagacatgggctagggaggggcagaagtggtgggagccaca  
D F L D G H D L Q L H W D S C L \*  
gaaccataaccagtgctgcagctcctctgactgctgagccttgacaatcacagctccctagaggc

**antisense** 

**Figure S2. Nucleotide and deduced amino acid sequences of BSAC.**

The nucleotide sequence data reported are available in the DDBJ databases under accession number AB588920. Arrows in red indicate the primers for cDNA cloning. The arrow's nucleotide sequences are excluded in the DDBJ database.

## Supplemental figure 3

# MELODY

sense

gcagagacacctgtcaggacggaaccacagctgatcttactgtgtgtgcagcactgatctgagagcacagctgtcatcccaaccttcaagaccactctgct  
gactgtggatgatccctcatgggaggggttaccatcacgaaagccaaggtggatttctccagtgtggtgtgctgcccccttccgtcattgtgtgtaatggg  
M G G V T I T K A K V D F S S V V C L P P S V I A V N G  
ctggacggagggggctggcgaatgatgaggaaccgggtgctcctgtctctgtctgctgccccagccccagagcgaagctgttgccaatgaactgcag  
L D G G G A G E N D E E P V L L S L S A A P S P Q S E A V A N E L Q  
gagctgtccctgcagcccagctgactctggcctccatcctgggaggaacccaattgcctccacttagtgagcgaagaatgtgctgcagttgaagctc  
E L S L Q P E L T L G L H P G R N P N L P P L S E R K N V L Q L K L  
cagcagcggcggaccgggaggagctggtgagccaagggatcatgcccctttgaaaagtccgggtgcatttcatgagcagagaaggagcctggagcggcc  
Q Q R R T R E E L V S Q G I M P L L K S P A A F H E Q R R S L E R A  
aggaccgaggaactatttgaacggaagatccgttccggccagagagatcagagctggtcaggatgcacattctggaagagacctcggtgagccttctctc  
R T E D Y L K R K I R S R P E R S E L V R M H I L E E T S A E P S L  
caggccaagcagctgaagctgaagagagccagactgcccgatgacctcaatgagaagattgcacagaggcctggccccatggagctggtggaagaatc  
Q A K Q L K L K R A R L A D D L N E K I A Q R P G P M E L V E K N I  
ttgccagctcagctcagaaggctctcattgtgggagcagcttaccctggagagcagcttccctttgacgagcagcagcagctgagcagctgccc  
L P V E S S L K E A L I V G Q V N Y P K V A D S S S F D E D S S D A  
ctgtctcctgagcagcctgcccagcctatgctccagggttcagtgccatcacccttggagctccggggccagcagctcacttccctagtgccacctccatca  
L S P E Q P A S H E S Q G S V P S P L E S R A S D L L P S A T S I S  
ccccaggttcttctcagctcccaatggctccggatcctggagagacgcttctccggcagcagcctcctcctcccccctcctcctcctcctcctcctc  
P T Q V L S Q L P M A P D P G E T L F L A E Q P P L P P P P L L P P  
agcctaaccagtggaagcatcgtccccactgccaagcccgccacactcatcaagcaagccaaccggaagtctgagcagcagagaagtcacagcgcagcaag  
S L T S G S I V P T A K P A P T L I K Q S Q P K S A S E K S Q R S K  
aaggccaagctgaagcgaagctgaagcgaagctcaagctaccacagctacccccggcaaaaagcagcagcagcagcagcagcagcagcagcagcagc  
K A K E L K P K V K K L K Y H Q Y I P P D Q K Q D K G A P A M D S S  
tacgccaagatcctgagcagcagcagcagctcttctgagctgcagatcctcaaccagcagcagcagcagcagcagcagcagcagcagcagcagcagc  
Y A K I L Q Q Q L F L Q L Q I L N Q Q Q Q Q Q Q Q H Y N Y Q A I  
ctgcccgcctcccaagcctcgggtgagactcccgaagcagctgccccacccccacagcagctcctccaccagtagcagctcagctcagcagcagcagc  
L P A P P K P S G E T P G S S A P T P S R S L S T S S S S S S G T P  
gggcccgtgggtgcccgtcagaacagcactgcccctggctggcaaccaggagcctgcccggccaacctggatgacatgaagtgccagagctgaagcag  
G P G G L A R Q N S T A L A G K P G A L P A N L D D M K V A E L K Q  
gagctgaagtgccgtcgtcctcagcaccagaagcagagctgattgagcagcctgctgctaccagaagcaagtcagcccagctccaggagcccccc  
E L K L R S L P V S G T K T E L I E R L R A Y Q D Q V S P A P G A P  
aaggccccctgccaccacctctgtcctgtccaaggctggtgaggtagtggtgccttccctgcccctgctgagcagcagcagcagcagcagcagcagc  
K A P A T T S V L S K A G E V V V A A F P A A L L S T G S A L V T A G  
cttgaccagctgagatggtggtggccacagtaaccagcaatggcatggtgaaagtgtggcagcagcagcagcagcagcagcagcagcagcagcagc  
L A P A E M V V A T V T S N G M V K F G S T G S T P P V S P T P S E  
cgctcactgctcagcagcgggtgatgagaattccacacctggggatgccttgggtgaaatggtgacatgcgccgtgacacagctcaccctgcagcctcccc  
R S L L S T G G D E N S T P G D A F G E M V T S P L T Q L T L Q A S P  
ctacagatcgtgaaggagggtgcccgtgctgctcctgctgctgagcctggtgacagcagcagcagcagcagcagcagcagcagcagcagcagcagc  
L Q I V K E E G A R A A S C C L S P G A R A E L E G L D K D Q M L Q  
gagaaggacaagcagattgaggagctgacccgaatgctccaacagaagcagcagcagcagcagcagcagcagcagcagcagcagcagcagcagcagc  
E K D K Q I E E L T R M L Q Q K Q Q L V E L L R L Q L E Q Q K R A Q  
cagcagcagcagcagcagcagcagcagcagcagcagcagcagcagcagcagcagcagcagcagcagcagcagcagcagcagcagcagcagcagc  
Q P A P A S S P V K R E S S F S S C Q L S C Q G G A A R A R A F G P G  
ctagtagtcccaccataaccatgagatgctcagctccagccccagctccccacctggtggtgaaacagcagcagcagcagcagcagcagcagcagc  
L V V P T T N H G D A Q A P A P E S P P V V V K Q E A G P P E P D L  
gcccctgctcctcagctgctcttgggtcgcagggcaccagcttccctcaagaaggtcagcctcctaccctggctcactgactctacaggaactcacctc  
A P A S Q L L G S Q G T S F L K K V S P P T L V T D S T G T H L I  
ctcactgtgaccaacaagagtgacatggcctggcctggccagggggagcccccaacagccttgcctccagcctggttctccagcctggtccacctgccc  
L T V T N K S A D G P G L P T G S P Q Q P L S Q P G S P A P G P P A  
cagatggacctggagcaccacctcagccttcaattgcaacccccacgtctctgctgaaagaaggagccgctgggtatgaagagactgtgactcagcagcct  
Q M D L E H P P Q P S F A T P T T S L L K K E P P G Y E E T V T Q Q P  
aagcagcaggaaggtcctccagtcagcagcagcagcagcagcagcagcagcagcagcagcagcagcagcagcagcagcagcagcagcagcagcagc  
K Q Q E N G S S S Q H M D D L F D I L I Q S G E I S A D F K E P P S  
ctaccagcaggaaggtcacctccagcagcagcagcagcagcagcagcagcagcagcagcagcagcagcagcagcagcagcagcagcagcagcagc  
L P G K E K S P P A E A Y G P P L T P Q P L P L S E L P Q A A P P P  
ggtcccccaagcctccagggccttgaagacttctggagagcagcagcagcagcagcagcagcagcagcagcagcagcagcagcagcagcagcagc  
G S P T L P G R L E D F L E S S T G L P L L T S G H E G P E P L S L  
atgatgacctccacagccagatgctgagcagctctgcccctggaccatccccatccccatggacacctctgaattgcacttctgctcctgagcccagc  
I D D L H S Q M L S S A I L D H P P S P M D T S E L H F A P E P S  
agtgtatggcctgagcagcagcagcagcagcagcagcagcagcagcagcagcagcagcagcagcagcagcagcagcagcagcagcagcagcagc  
S G M G L D L A V T G H L D S M D W L E L S S G G P V L S L A P L S T  
acagccccagcctctctcagtgagcttctggatggccagcagcttgcagctccactgggattcctgctttagcctctgactcagacatgggctaggg  
T A P S L F S M D F L D G H D L Q L H W D S C L \*  
agggtcagaagttggggagccacagaaccataaccagtggtgcgatccctgtgactgtgagccttgacaatcacagtccttagaggc

antisense

**Figure S3. Nucleotide and deduced amino acid sequences of MELODY.**

The nucleotide sequence data reported are available in the DDBJ databases under accession number AB588921. Arrows in red indicate the primers for cDNA cloning. The arrow's nucleotide sequences are excluded in the DDBJ database.

## Supplemental figure 4

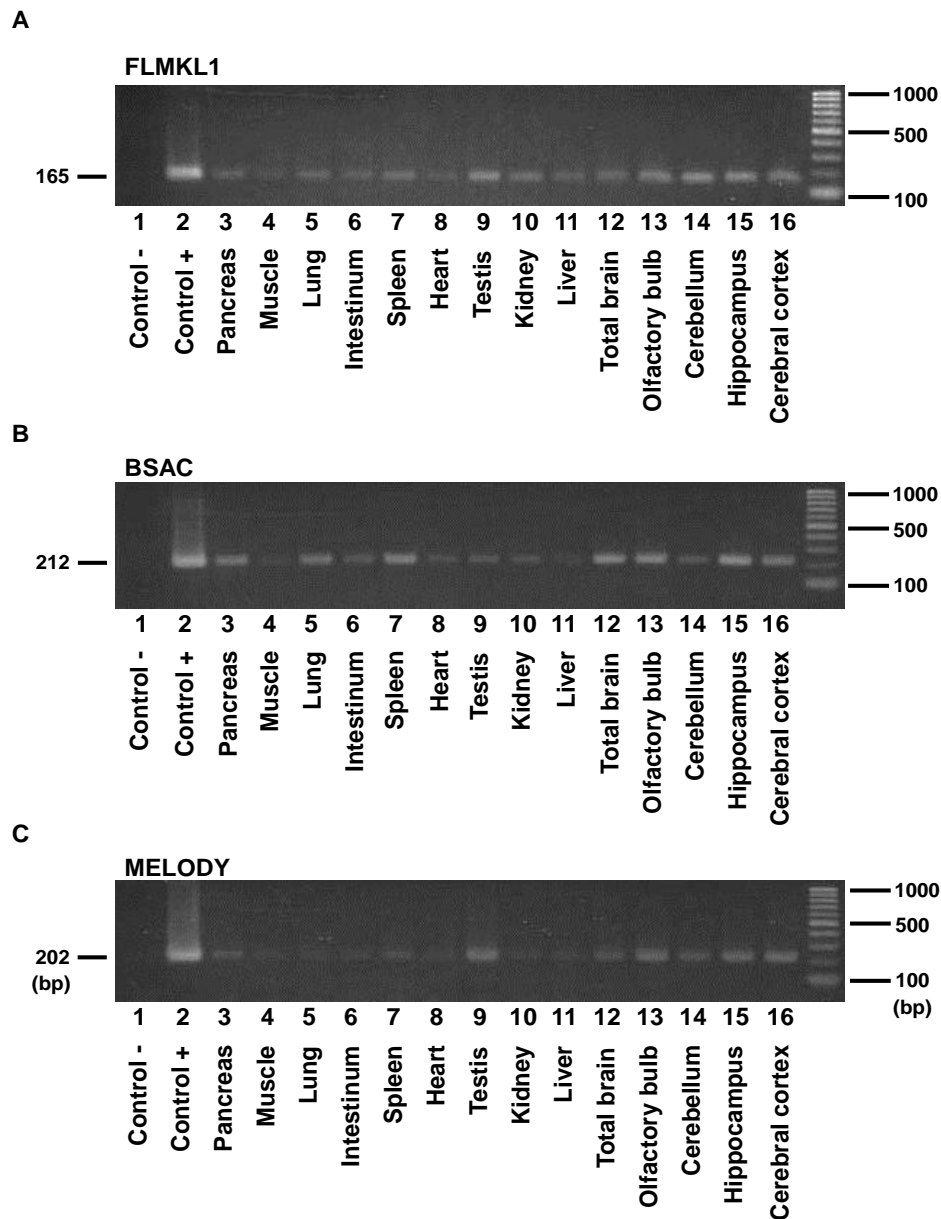

### Figure S4. Specific detection of PCR product by amplification with primers for FLMKL1, BSAC, MELODY.

Total RNA was extracted from 14 kinds of tissues (pancreas, muscle, lung, intestine, spleen, heart, testis, kidney, liver, total brain, olfactory bulb, cerebellum, hippocampus, cerebral cortex) of 7-week old rats and reverse transcribed. Then, the samples were amplified by PCR with primers for FLMKL1 (A), BSAC (B) or MELODY (C). Control minus indicates that PCR was performed by using the total brain-derived sample without reverse transcriptase-treatment. Control plus indicates that PCR was performed by using a template plasmid of FLMKL1 (A), BSAC (B) or MELODY (C), which was identical to the plasmid used for calculation of standard curves in Figs. 3 and 4. Every PCR assay was performed using the following parameters: preheating at 95 ° C for 10 min, denaturation at 95 ° C for 45 s, annealing at 60 ° C for 45 s, and extension at 72 ° C for 1 min for 35 cycles. The size of PCR products was 165 bp (FLMKL1), BSAC (212 bp) or MELODY (202 bp). The rightmost lane: DNA size marker.
